# Supplementary material for: Scoparone Exerts Anti-Tumor Activity against DU145 Prostate Cancer Cells via Inhibition of STAT3 Activity
Source: PubMed Central journal article supplement (PMC3829856; doi:10.1371/journal.pone.0080391), 2013-11-15

Figure S4

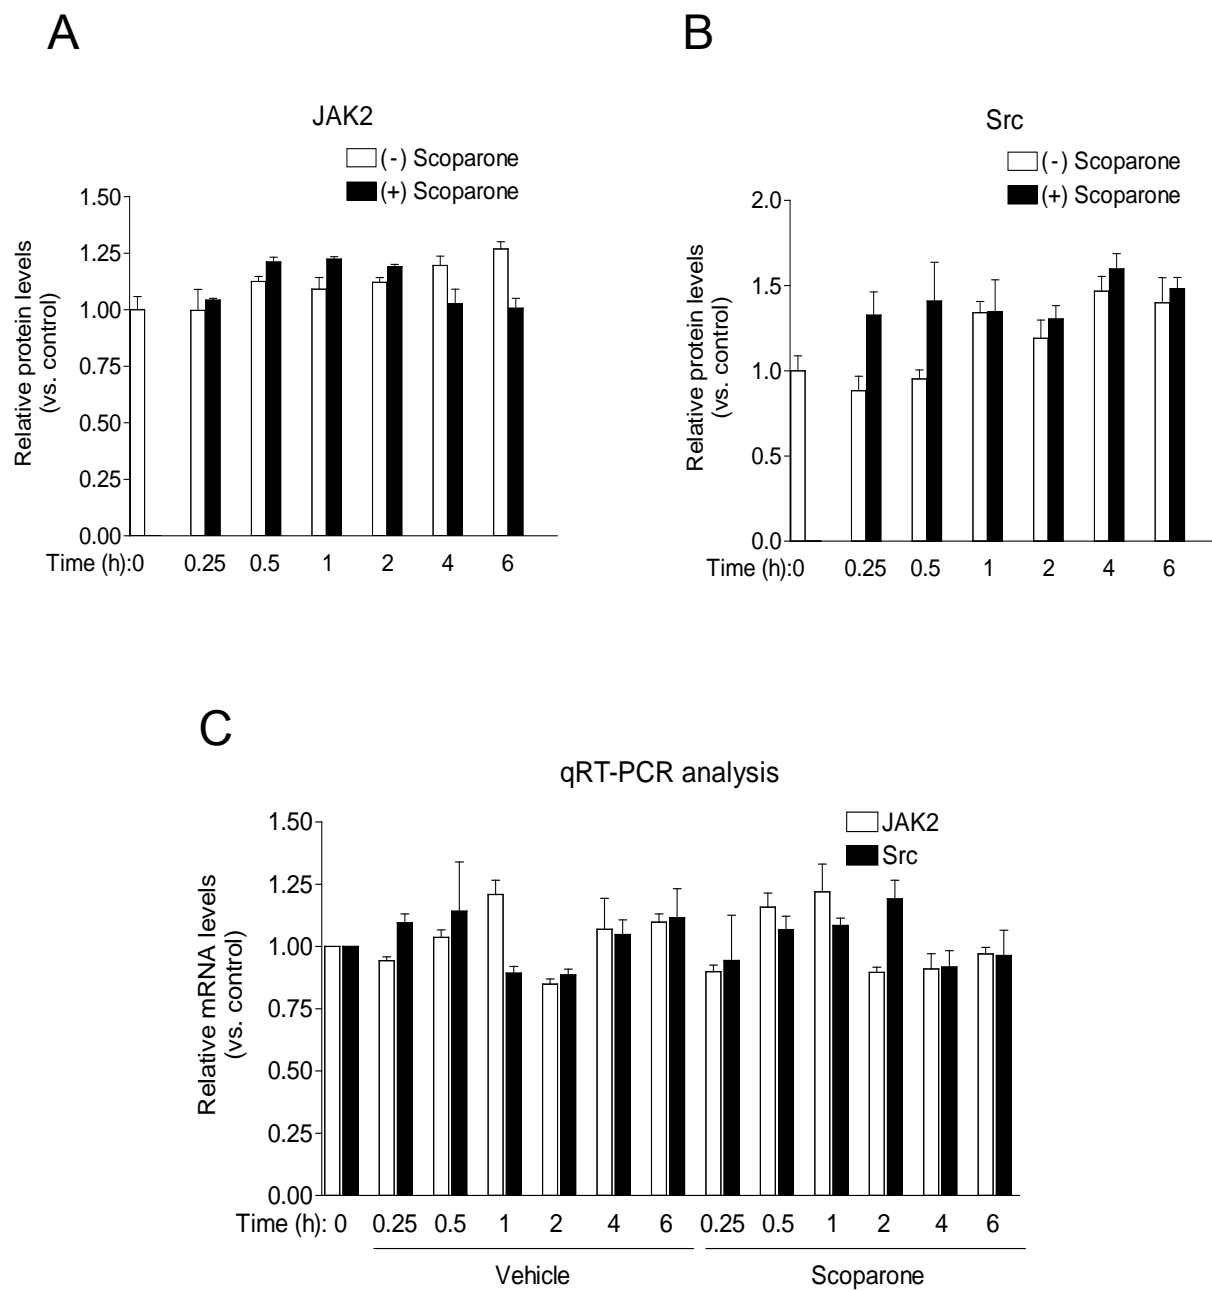

Supplement: pone.0080391.s004.pdf [file pone.0080391.s004.pdf]
