# Supplementary material for: Scoparone Exerts Anti-Tumor Activity against DU145 Prostate Cancer Cells via Inhibition of STAT3 Activity
Source: PubMed Central journal article supplement (PMC3829856; doi:10.1371/journal.pone.0080391), 2013-11-15
Supplement: pone.0080391.s005.pdf [file pone.0080391.s005.pdf]

**Table S1. Primer sequences for qRT-PCR**

| Gene                        | Primer sequences                       | Size (bp) | Annealing (°C) | GenBank Accession No. |
|-----------------------------|----------------------------------------|-----------|----------------|-----------------------|
| <i>Cyclin D<sub>1</sub></i> | Forward: 5'- GGTGGCCGCGAGTGCAA-3'      | 72        | 60             | NM_053056             |
|                             | Reverse: 5'- GAAGCGTGTGAGGCGGTAGTA-3'  |           |                |                       |
| <i>Survivin</i>             | Forward: 5'- TCCACTGCCCCACTGAGAAC-3'   | 69        | 60             | NM_001012270          |
|                             | Reverse: 5'- CAGCCTTCCAGCTCCTTGAA-3'   |           |                |                       |
| <i>c-Myc</i>                | Forward: 5'- GAGGCGAACACACAACGTCTT-3'  | 70        | 60             | NM_002467             |
|                             | Reverse: 5'- CACGCAGGGCAAAAAAGC-3'     |           |                |                       |
| <i>BCL2</i>                 | Forward: 5'- GGGATGCCTTTGTGGAAGT-3'    | 61        | 60             | NM_000633             |
|                             | Reverse: 5'- CAGCCAGGAGAAATCAAACAGA-3' |           |                |                       |
| <i>SOCS3</i>                | Forward: 5'- GGACCAGCGCCACTTCTTC-3'    | 69        | 60             | NM_003955             |
|                             | Reverse: 5'- ACACTGGATGCGCAGGTTCT-3'   |           |                |                       |
| <i>Jak2</i>                 | Forward: 5'- TGATTTTGTGCACGGATGGA-3'   | 73        | 60             | NM_004972             |
|                             | Reverse: 5'- ACACTGCCATCCCAAGACATTC-3' |           |                |                       |
| <i>Src</i>                  | Forward: 5'- GACCTTCGTGCAGCCAACAT-3'   | 71        | 60             | NM_005417             |
|                             | Reverse: 5'- CCGAGCCAGCCCAAAGT-3'      |           |                |                       |
| <i>Rplp0/<br/>36B4</i>      | Forward: 5'-CCACGCTGCTGAACATGCT-3'     | 66        | 60             | NM_001002             |
|                             | Reverse: 5'-TCGAACACCTGCTGGATGAC-3'    |           |                |                       |
